# Supplementary material
Source: Hindawi journal article supplement (doi:10.1155/2010/495904)
Supplement: f1 [file 495904.f1.pdf]

# Supplement

to

**NOVOMIR:**

## ***de novo* prediction of microRNA-coding regions in a single plant genome**

Jan-Hendrik Teune and Gerhard Steger\*

Heinrich-Heine-Universität Düsseldorf, Institut für Physikalische Biologie, Universitätsstr. 1,  
D-40225 Düsseldorf, Germany

\* Corresponding author; Tel.: +211 81 14597; Fax: +211 81 15167

E-mail addresses: [teune@biophys.uni-duesseldorf.de](mailto:teune@biophys.uni-duesseldorf.de); [steger@biophys.uni-duesseldorf.de](mailto:steger@biophys.uni-duesseldorf.de)

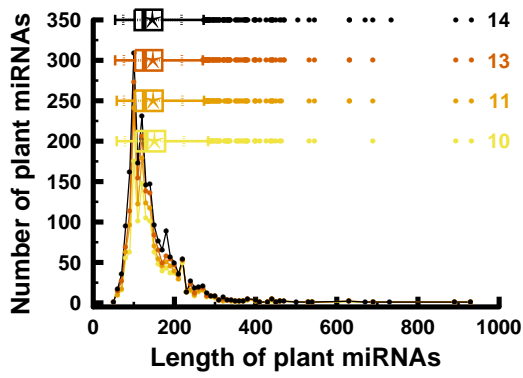

| MIRBASE<br>version   | length/nt  |     |        |     |
|----------------------|------------|-----|--------|-----|
|                      | mean       | Q1  | median | Q3  |
| plant pre-miRNAs     |            |     |        |     |
| 10.0                 | 150.8±72.6 | 105 | 130    | 177 |
| 11.0                 | 147.6±72.1 | 103 | 126    | 171 |
| 13.0                 | 147.0±71.5 | 103 | 126    | 170 |
| 14.0                 | 145.7±71.9 | 102 | 125    | 170 |
| non-plant pre-miRNAs |            |     |        |     |
| 10.0                 | 87.7±14.0  | 78  | 86     | 97  |
| 11.0                 | 87.2±15.6  | 77  | 86     | 97  |
| 13.0                 | 89.0±15.8  | 78  | 87     | 97  |
| 14.0                 | 87.2±15.9  | 76  | 86     | 97  |

**Figure S1: Length distribution of pre-miRNA in different versions of MIRBASE.** Left: Data for plant pre-miRNAs in MIRBASE versions 10, 11, 13, and 14 are given in yellow, orange, red, and black, respectively. Mean and standard deviation are marked by a star and dotted lines. Median (thick vertical bar), quartiles, and outliers are depicted as box plots. Right: Values in tabular form.

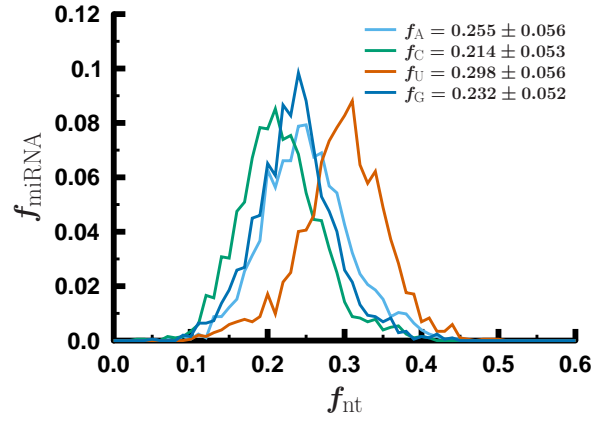

| MIRBASE                    | $f_{nt}$    |             |             |             |
|----------------------------|-------------|-------------|-------------|-------------|
| version                    | A           | C           | U           | G           |
| <b>plant pre-miRNAs</b>    |             |             |             |             |
| 10.0                       | 0.249±0.056 | 0.221±0.051 | 0.291±0.057 | 0.239±0.051 |
| 11.0                       | 0.249±0.054 | 0.220±0.051 | 0.294±0.055 | 0.237±0.049 |
| 13.0                       | 0.252±0.056 | 0.217±0.053 | 0.296±0.056 | 0.234±0.051 |
| 14.0                       | 0.255±0.056 | 0.214±0.053 | 0.298±0.056 | 0.232±0.052 |
| <b>mature plant miRNAs</b> |             |             |             |             |
| 10.0                       | 0.242±0.098 | 0.234±0.106 | 0.260±0.100 | 0.265±0.098 |
| 11.0                       | 0.242±0.097 | 0.237±0.104 | 0.257±0.099 | 0.264±0.097 |
| 13.0                       | 0.245±0.099 | 0.231±0.105 | 0.260±0.102 | 0.264±0.099 |
| 14.0                       | 0.245±0.099 | 0.233±0.107 | 0.262±0.102 | 0.260±0.101 |

**Figure S2: Nucleotide composition of plant pre-miRNAs and mature miRNAs in different versions of MIRBASE.** Top: Data for pre-miRNAs in MIRBASE version 14. Bottom: Data in tabulated form for MIRBASE versions 10, 11, 13, and 14.

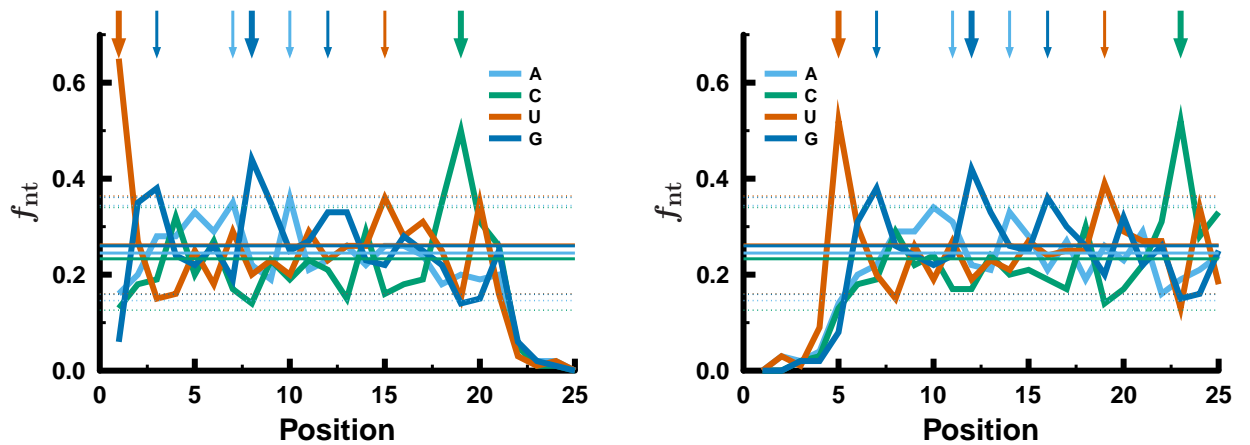

**Figure S3: Nucleotide distribution in mature plant miRNAs from MIRBASE version 14.** The mean length is 22.2 nt; the length of the longest sequence is 25 nt. The nucleotide distribution was determined either starting from the 5' end (left) or from the 3' end (right) of all mature miRNAs. The horizontal lines mark the mean nucleotide content of miRNAs (solid) and its standard deviation (dotted). The arrows mark positions with frequencies of a certain nucleotide above mean plus standard deviation.

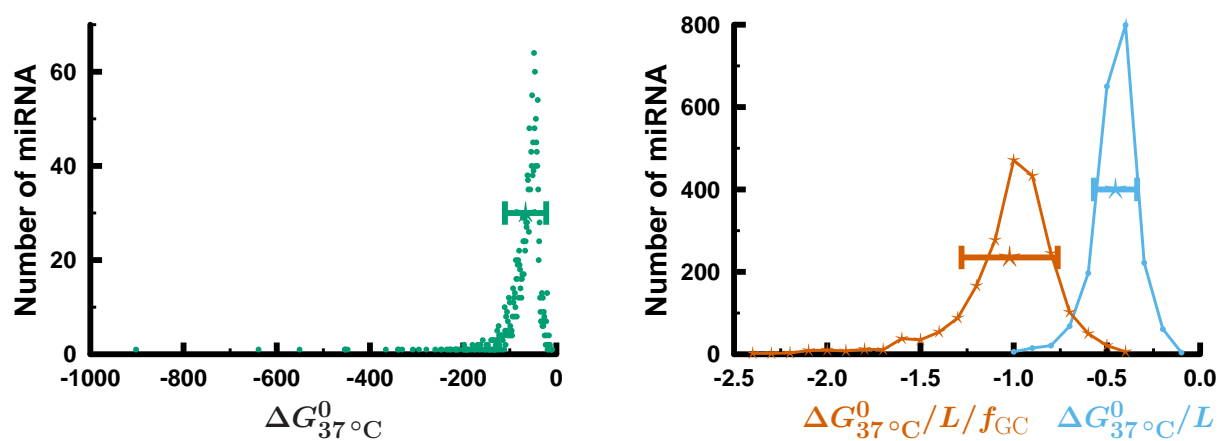

**Figure S4: Minimum of free energy (in kcal/mol) of secondary structures of plant pre-miRNA in MIRBASE version 14.** Calculations were done by RNAFOLD [1] using default parameters. Energies were binned into 1 kcal/mol (left) or in 0.1 kcal/mol (right) bins. In the right plot, energy values are normalized to the length of pre-miRNA ( $\Delta G/L$ ) and to GC-content of the pre-miRNA sequences ( $\Delta G/L/f_{\text{GC}}$ ), respectively.

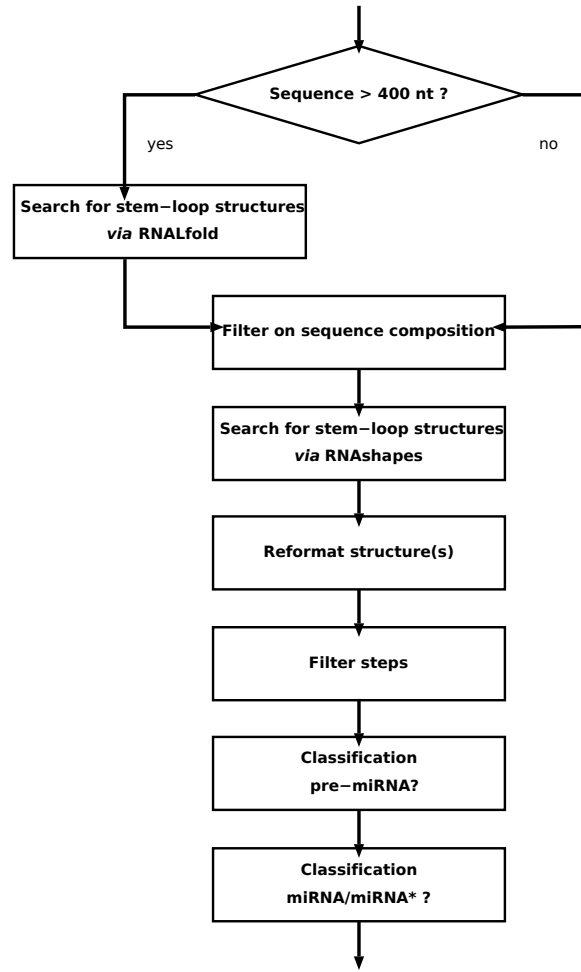

**Figure S5: Workflow in NOVOMIR.** RNALFOLD [2] is used to search for sub-sequences with local stem-loop structures if the sequence is longer than 500 nt. Each sub-sequence or the original sequence (shorter than 500 nt) is rejected if it contains a strongly biased nucleotide composition. RNASHAPES [3] is used to predict structures for the sequence up to a certain energy threshold. Predicted structures are reformatted into an alignment-like format (see Fig. 1). If a structure satisfies several filter criteria, NOVOMIR calculates the probability that the sequence (and its structure) might be a pre-miRNA. If so, NOVOMIR predicts the localization of the miRNA/miRNA\* complex in the presumed pre-miRNA.

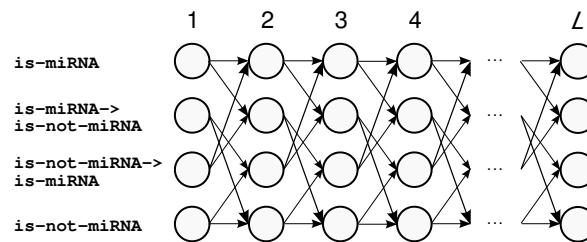

**Figure S6: Hidden-Markov model used for classification.**





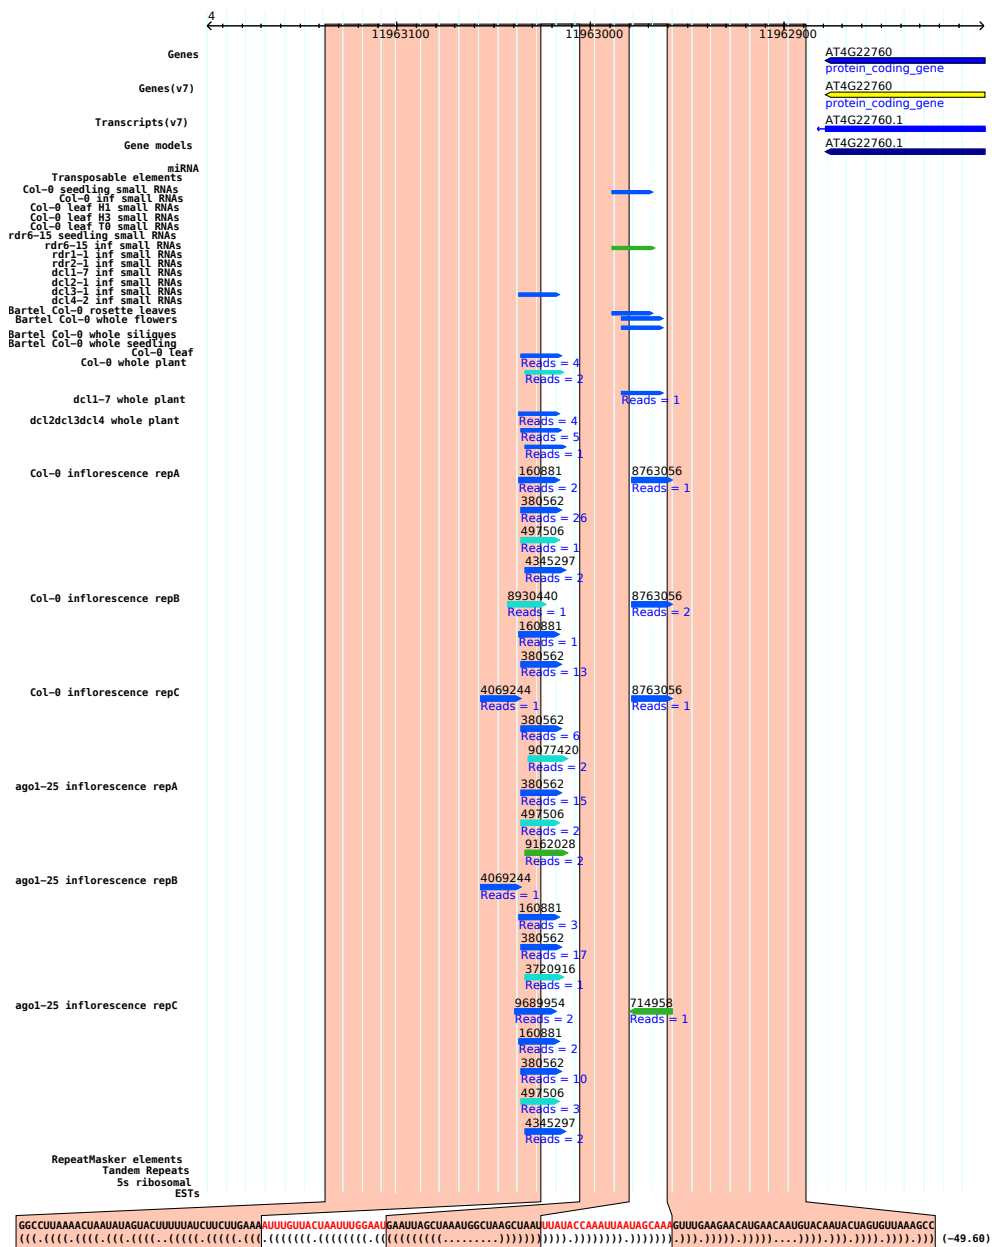

**Figure S9: Expression pattern of a pre-miRNA candidate viewed in the ASRP browser.** This screen shot shows the genomic sequence region from nt 11,963,200 to nt 11,962,800 of *A. thaliana* chromosome 4. For further details see Fig. S7 and Fig. S8.







**Table S1: Sensitivity of NOVOMIR.** Comparison of NOVOMIR’s sensitivity for detecting plant pre-miRNAs from different versions of MIRBASE. The column “MIRBASE 14 - MIRBASE 10” shows values for sequences from MIRBASE 14 which are not present in MIRBASE 10. Note that NOVOMIR’s thresholds and probabilities were learned only from *A. thaliana* sequences in MIRBASE version 10.

| Species                           | MIRBASE 10  |     |     |             | MIRBASE 14  |      |     |             | MIRBASE 14 - MIRBASE 10 |     |     |             |
|-----------------------------------|-------------|-----|-----|-------------|-------------|------|-----|-------------|-------------------------|-----|-----|-------------|
|                                   | # sequences | TP  | FN  | Sensitivity | # sequences | TP   | FN  | Sensitivity | # sequences             | TP  | FN  | Sensitivity |
| plant                             | 1247        | 987 | 260 | 0.79        | 2030        | 1608 | 422 | 0.79        | 788                     | 627 | 161 | 0.80        |
| <i>Arabidopsis thaliana</i>       | 184         | 154 | 30  | 0.84        | 190         | 158  | 32  | 0.83        | 6                       | 4   | 2   | 0.67        |
| <i>Aquilegia coerulea</i>         | 0           | —   | —   | —           | 45          | 36   | 9   | 0.80        | —                       | —   | —   | —           |
| <i>Brachypodium distachyon</i>    | 0           | —   | —   | —           | 19          | 5    | 14  | 0.26        | —                       | —   | —   | —           |
| <i>Brassica napus</i>             | 4           | 3   | 1   | 0.75        | 45          | 40   | 5   | 0.89        | 42                      | 37  | 5   | 0.88        |
| <i>Brassica oleracea</i>          | 0           | —   | —   | —           | 5           | 5    | 0   | 1.00        | —                       | —   | —   | —           |
| <i>Brassica rapa</i>              | 0           | —   | —   | —           | 17          | 16   | 1   | 0.94        | —                       | —   | —   | —           |
| <i>Carica papaya</i>              | 0           | —   | —   | —           | 1           | 0    | 1   | 0.00        | —                       | —   | —   | —           |
| <i>Chlamydomonas reinhardtii</i>  | 43          | 37  | 6   | 0.86        | 44          | 38   | 6   | 0.86        | —                       | —   | —   | —           |
| <i>Gossypium herbaceum</i>        | 0           | —   | —   | —           | 1           | 1    | 0   | 1.00        | —                       | —   | —   | —           |
| <i>Gossypium hirsutum</i>         | 0           | —   | —   | —           | 13          | 11   | 2   | 0.85        | —                       | —   | —   | —           |
| <i>Gossypium raimondii</i>        | 0           | —   | —   | —           | 2           | 2    | 0   | 1.00        | —                       | —   | —   | —           |
| <i>Glycine max</i>                | 22          | 19  | 3   | 0.86        | 85          | 67   | 18  | 0.79        | 65                      | 50  | 15  | 0.77        |
| <i>Lotus japonicus</i>            | 0           | —   | —   | —           | 2           | 2    | 0   | 1.00        | —                       | —   | —   | —           |
| <i>Malus domestica</i>            | 0           | —   | —   | —           | 1           | 1    | 0   | 1.00        | —                       | —   | —   | —           |
| <i>Medicago truncatula</i>        | 30          | 27  | 3   | 0.90        | 108         | 100  | 8   | 0.93        | 78                      | 73  | 5   | 0.94        |
| <i>Oryza sativa</i>               | 243         | 199 | 44  | 0.82        | 414         | 338  | 76  | 0.82        | 173                     | 142 | 31  | 0.82        |
| <i>Populus euphratica</i>         | 0           | —   | —   | —           | 8           | 2    | 6   | 0.25        | —                       | —   | —   | —           |
| <i>Physcomitrella patens</i>      | 220         | 166 | 54  | 0.76        | 230         | 175  | 55  | 0.76        | 10                      | 9   | 1   | 0.90        |
| <i>Pinus taeda</i>                | 27          | 21  | 6   | 0.78        | 37          | 23   | 14  | 0.62        | 10                      | 2   | 8   | 0.20        |
| <i>Populus trichocarpa</i>        | 215         | 154 | 61  | 0.72        | 234         | 169  | 65  | 0.72        | 19                      | 15  | 4   | 0.79        |
| <i>Phaseolus vulgaris</i>         | 0           | —   | —   | —           | 8           | 6    | 2   | 0.75        | —                       | —   | —   | —           |
| <i>Sorghum bicolor</i>            | 66          | 52  | 14  | 0.79        | 140         | 106  | 34  | 0.76        | 74                      | 55  | 19  | 0.74        |
| <i>Solanum lycopersicum</i>       | 0           | —   | —   | —           | 30          | 27   | 3   | 0.90        | —                       | —   | —   | —           |
| <i>Selaginella moellendorffii</i> | 57          | 53  | 4   | 0.93        | 57          | 53   | 4   | 0.93        | —                       | —   | —   | —           |
| <i>Saccharum officinarum</i>      | 16          | 8   | 8   | 0.50        | 16          | 8    | 8   | 0.50        | —                       | —   | —   | —           |
| <i>Triticum aestivum</i>          | 28          | 20  | 8   | 0.71        | 31          | 22   | 9   | 0.71        | —                       | —   | —   | —           |
| <i>Vigna unguiculata</i>          | 0           | —   | —   | —           | 2           | 2    | 0   | 1.00        | —                       | —   | —   | —           |
| <i>Vitis vinifera</i>             | 0           | —   | —   | —           | 140         | 110  | 30  | 0.79        | —                       | —   | —   | —           |
| <i>Zea mays</i>                   | 92          | 74  | 18  | 0.80        | 105         | 85   | 20  | 0.81        | 13                      | 11  | 2   | 0.85        |

## References

- [1] Hofacker, I. (2003). Vienna RNA secondary structure server. *Nucleic Acids Res.*, **31**, 3429–3431.
- [2] Hofacker, I., Priwitzer, B., and Stadler, P. (2004). Prediction of locally stable RNA secondary structures for genome-wide surveys. *Bioinformatics*, **20**, 186–190.
- [3] Steffen, P., Voss, B., Rehmsmeier, M., Reeder, J., and Giegerich, R. (2006). RNAshapes: an integrated RNA analysis package based on abstract shapes. *Bioinformatics*, **22**, 500–503.
